# Supplementary material for: Association ofNEFLGene Polymorphisms with Wilms’ Tumor Susceptibility in Chinese Children
Source: Hindawi journal article supplement (doi:10.1155/2019/3518149), 2019-04-01
Supplement: f1 [file 3518149.f1.pdf]

**Supplemental Table 1:** Frequency distribution of selected variables for Wilms' tumor cases and cancer-free controls.

| Variables        | Cases (n=145) |       | Controls (n=531) |       | <i>P</i> <sup>a</sup> |
|------------------|---------------|-------|------------------|-------|-----------------------|
|                  | No.           | %     | No.              | %     |                       |
| Age range, month | 1-132         |       | 0.07-156         |       | 0.725                 |
| Mean ± SD        | 26.17 ± 21.48 |       | 29.73 ± 24.86    |       |                       |
| ≤18              | 66            | 45.52 | 233              | 43.88 | 0.956                 |
| >18              | 79            | 54.48 | 298              | 56.12 |                       |
| Gender           |               |       |                  |       | 0.956                 |
| Female           | 64            | 44.14 | 233              | 43.88 |                       |
| Male             | 81            | 55.86 | 298              | 56.12 |                       |
| Clinical stages  |               |       |                  |       |                       |
| I                | 4             | 2.76  |                  |       |                       |
| II               | 49            | 33.79 |                  |       |                       |
| III              | 50            | 34.48 |                  |       |                       |
| IV               | 33            | 22.76 |                  |       |                       |
| NA               | 9             | 6.21  |                  |       |                       |

SD, standard deviation; NA, not available.

<sup>a</sup> Two-sided  $\chi^2$  test for distributions between Wilms' tumor cases and cancer-free controls.

**Supplemental Table 2:** Potential functions of the three selected *NEFL* polymorphisms as predicted by SNPinfo online software (<https://snpinfo.niehs.nih.gov/snpinfo/snpfunc.html>).

| rs         | Chromosome | Allele | TFBS | miRNA (miRanda) | Allele | Asian | CHB   |
|------------|------------|--------|------|-----------------|--------|-------|-------|
| rs11994014 | 8          | A/G    | --   | --              | G      | 0.649 | 0.613 |
| rs2979704  | 8          | C/T    | Y    | Y               | T      | 0.605 | 0.614 |
| rs1059111  | 8          | T/A    | Y    | Y               | A      | 0.606 | 0.567 |

TFBS, transcription factor binding sites; CHB, Han Chinese in Beijing, China.

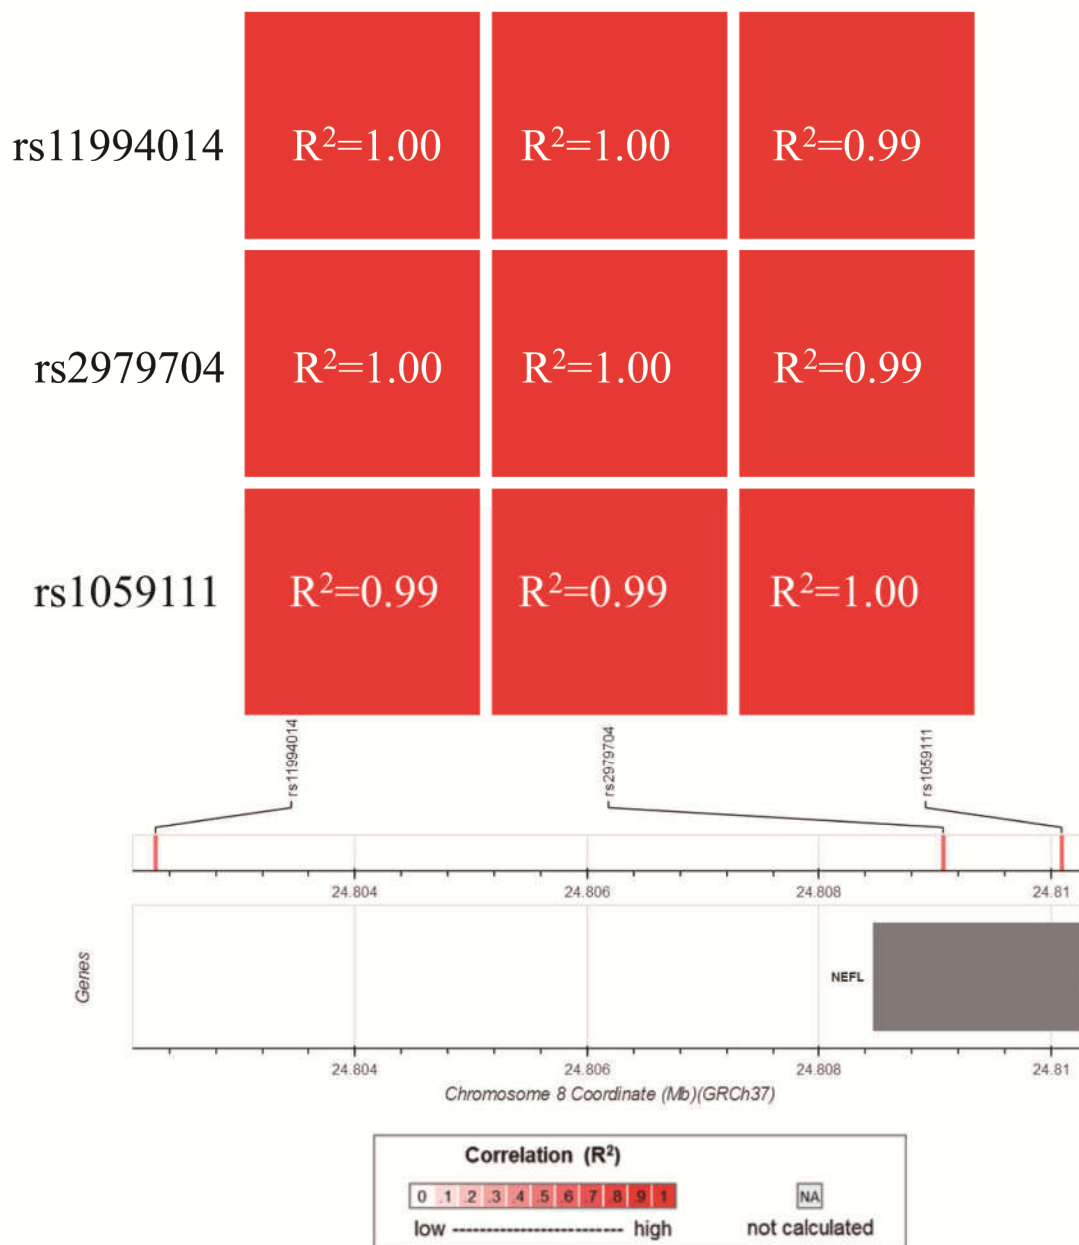

**Supplemental Figure 1:** Linkage disequilibrium analysis for the three selected polymorphisms in *NEFL* gene in Han Chinese population consisted of CHB (Han Chinese in Beijing, China) and CHS (Southern Han Chinese) subjects using data from LDlink online software (<https://ldlink.nci.nih.gov/?tab=ldmatrix>).
